# Supplementary material for: Machine learning algorithm to characterize antimicrobial resistance associated with the International Space Station surface microbiome
Source: PubMed Central journal article supplement (PMC9400218; doi:10.1186/s40168-022-01332-w), 2022-08-24

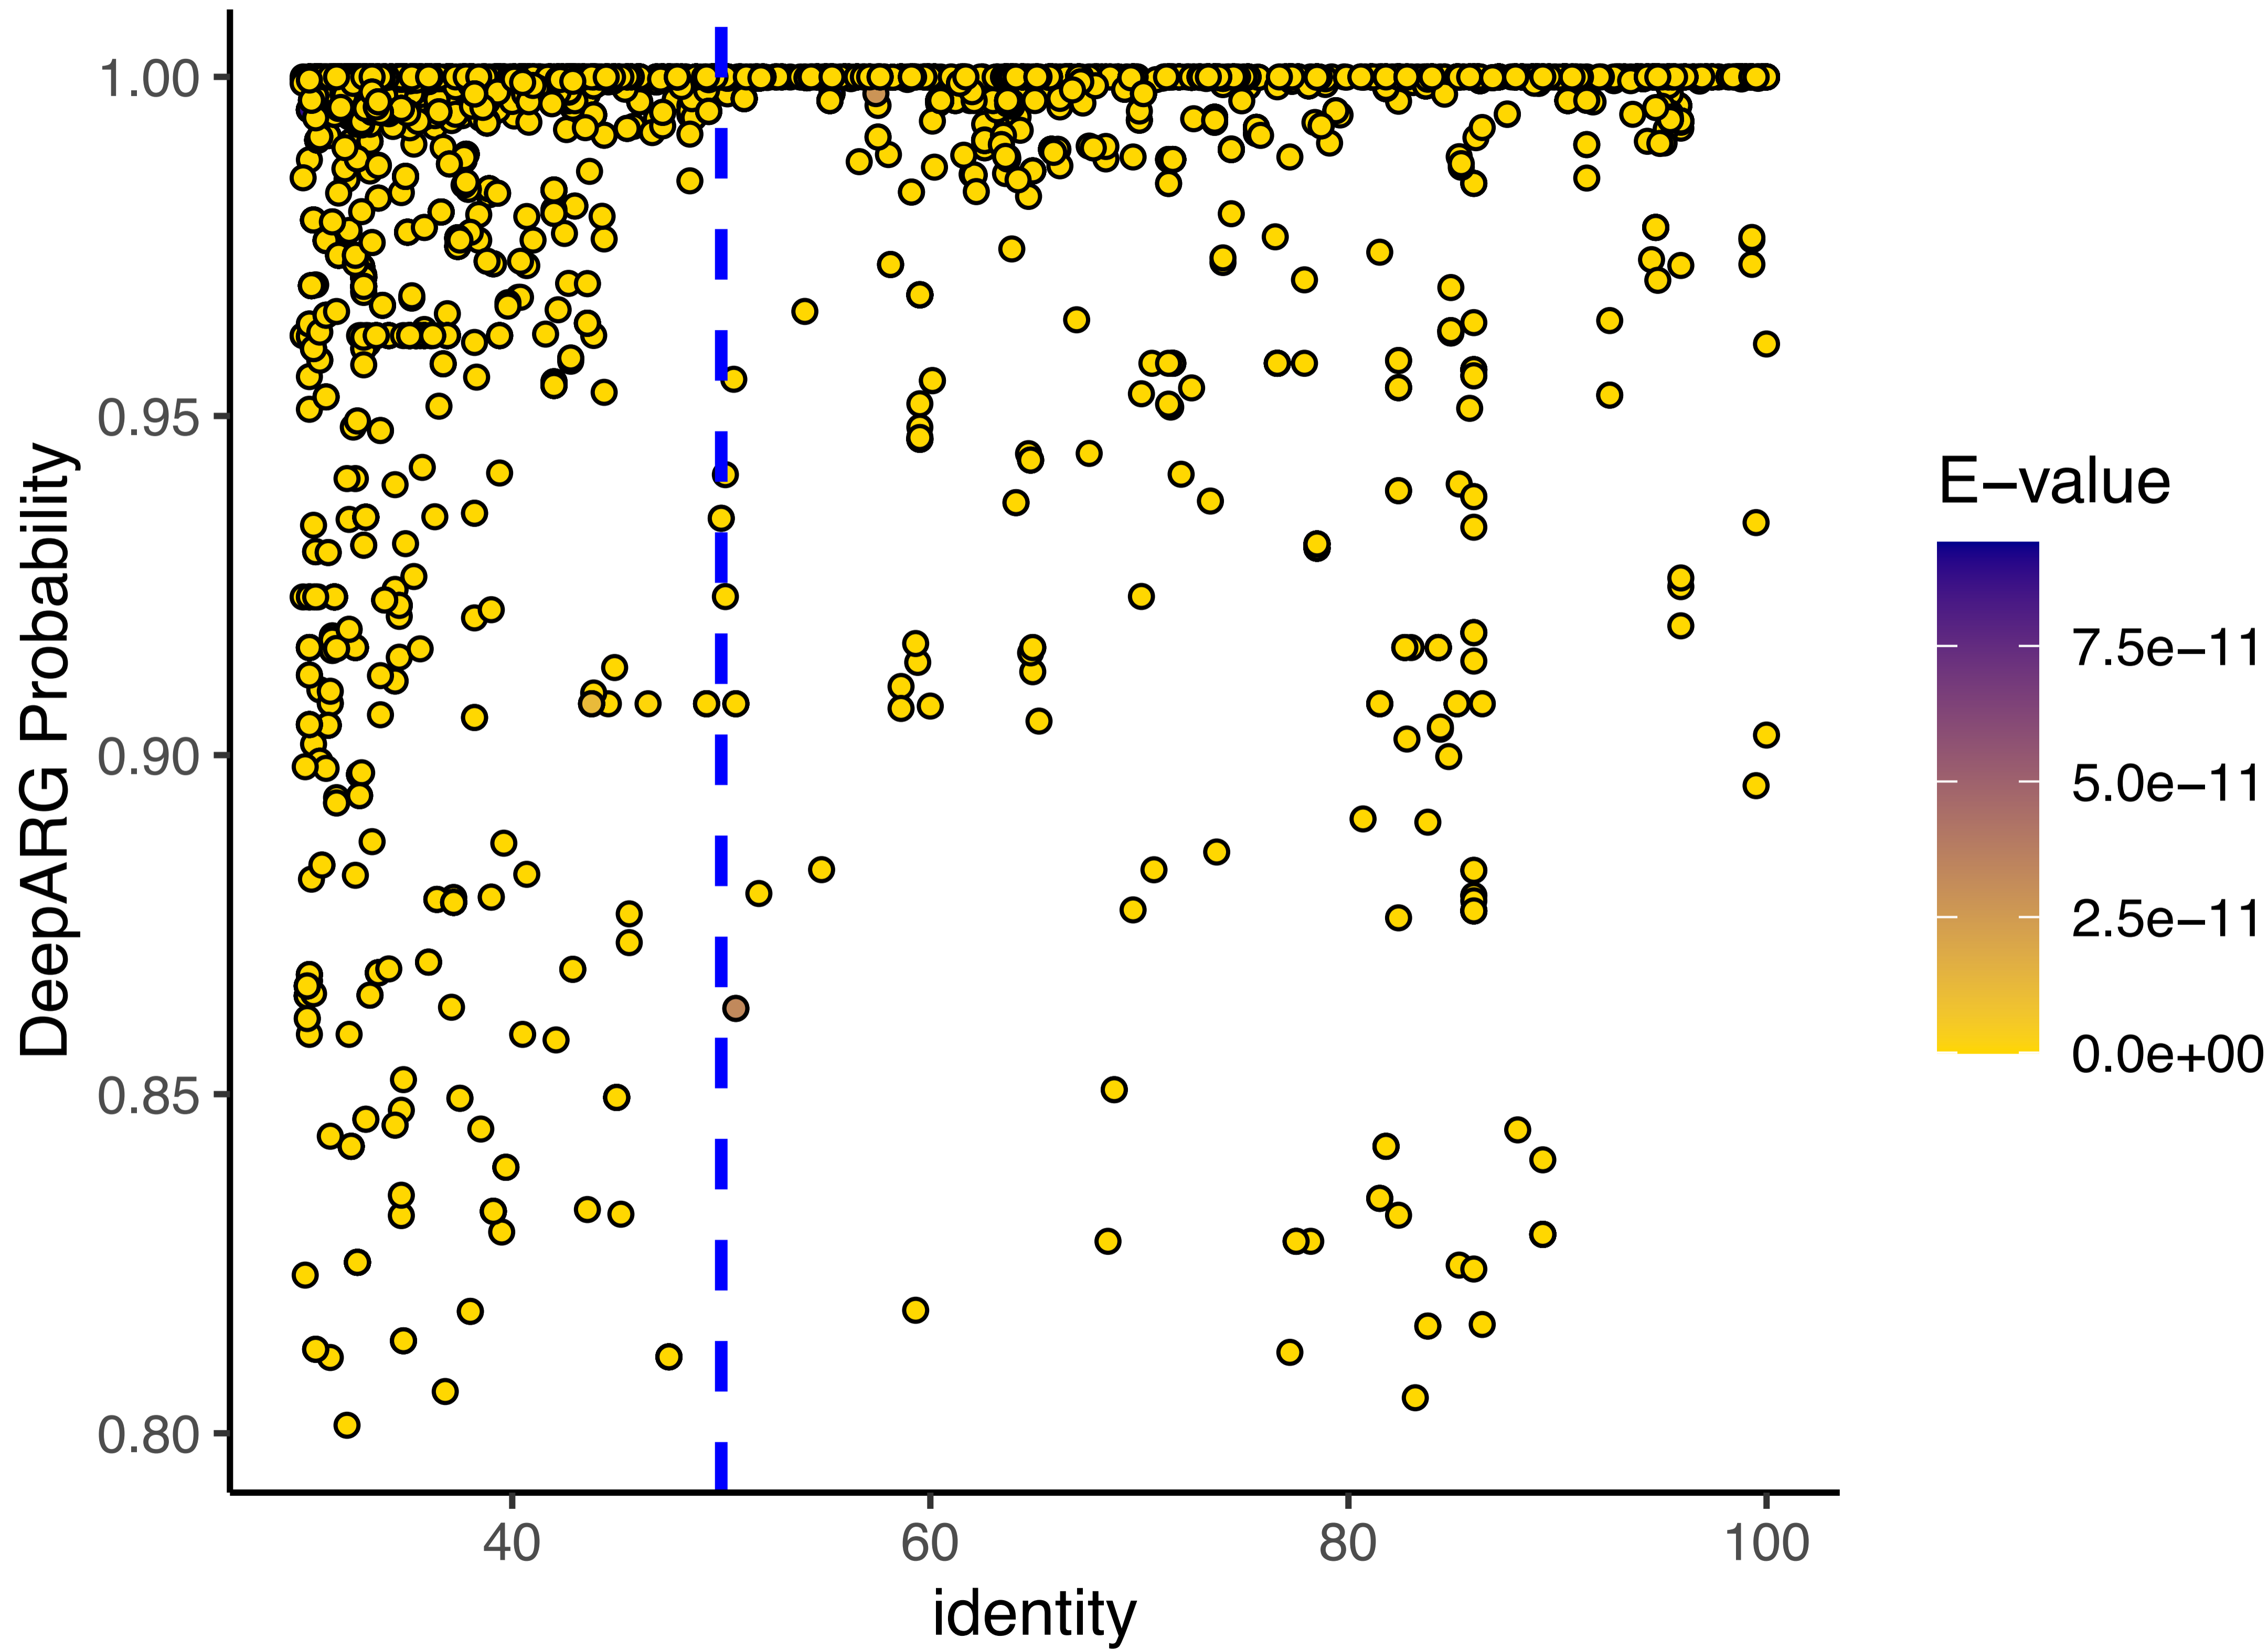

Supplement: 40168_2022_1332_MOESM1_ESM.pdf [file 40168_2022_1332_MOESM1_ESM.pdf]
